# Supplementary material for: Identification of candidate genes for fiber length quantitative trait loci through RNA-Seq and linkage and physical mapping in cotton
Source: PubMed Central journal article supplement (PMC5452627; doi:10.1186/s12864-017-3812-5), 2017-05-31

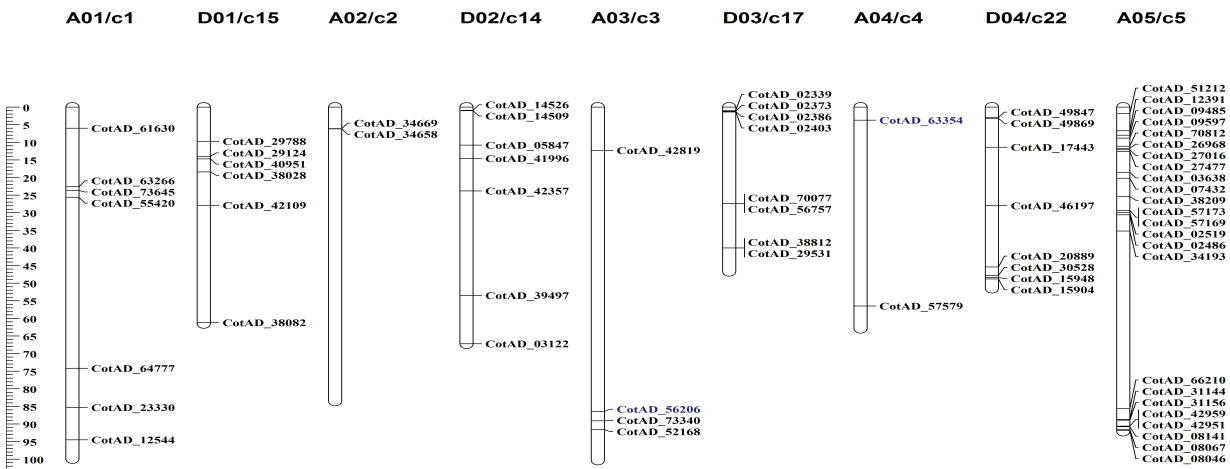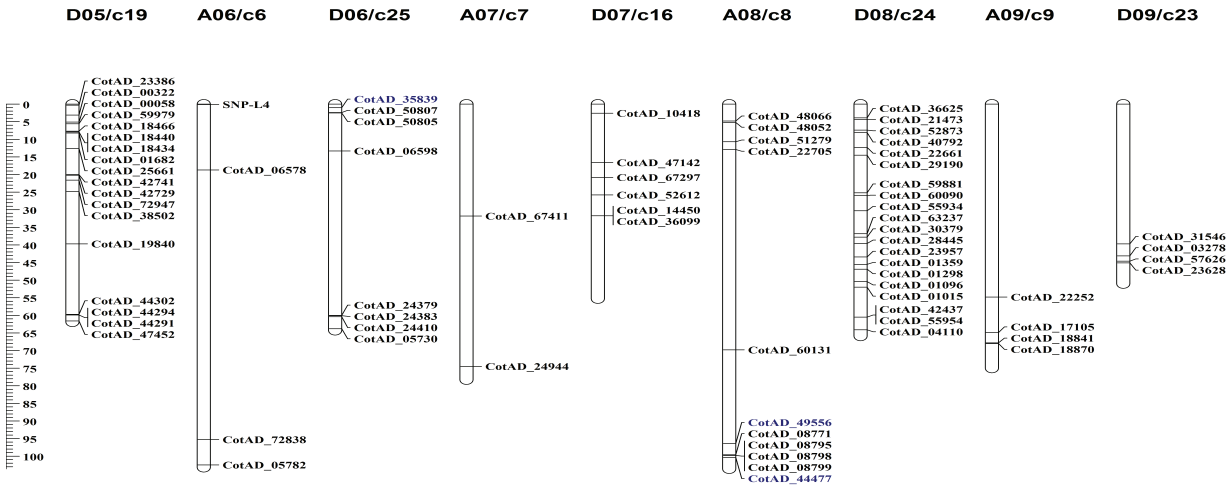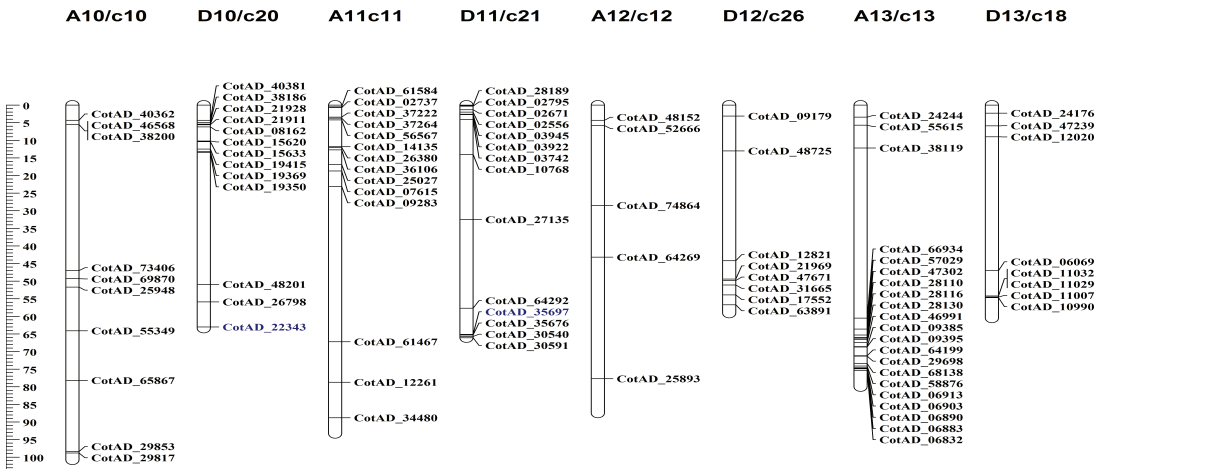

Supplement: 12864_2017_3812_MOESM6_ESM.pdf [file 12864_2017_3812_MOESM6_ESM.pdf]
